# Supplementary material for: A New Meroditerpene and a New Tryptoquivaline Analog from the Algicolous Fungus Neosartorya takakii KUFC 7898
Source: PubMed Central journal article supplement (PMC4483656; doi:10.3390/md13063776), 2015-06-15
Supplement: marinedrugs-13-03776-s001.pdf [file marinedrugs-13-03776-s001.pdf]

# Supplementary Information

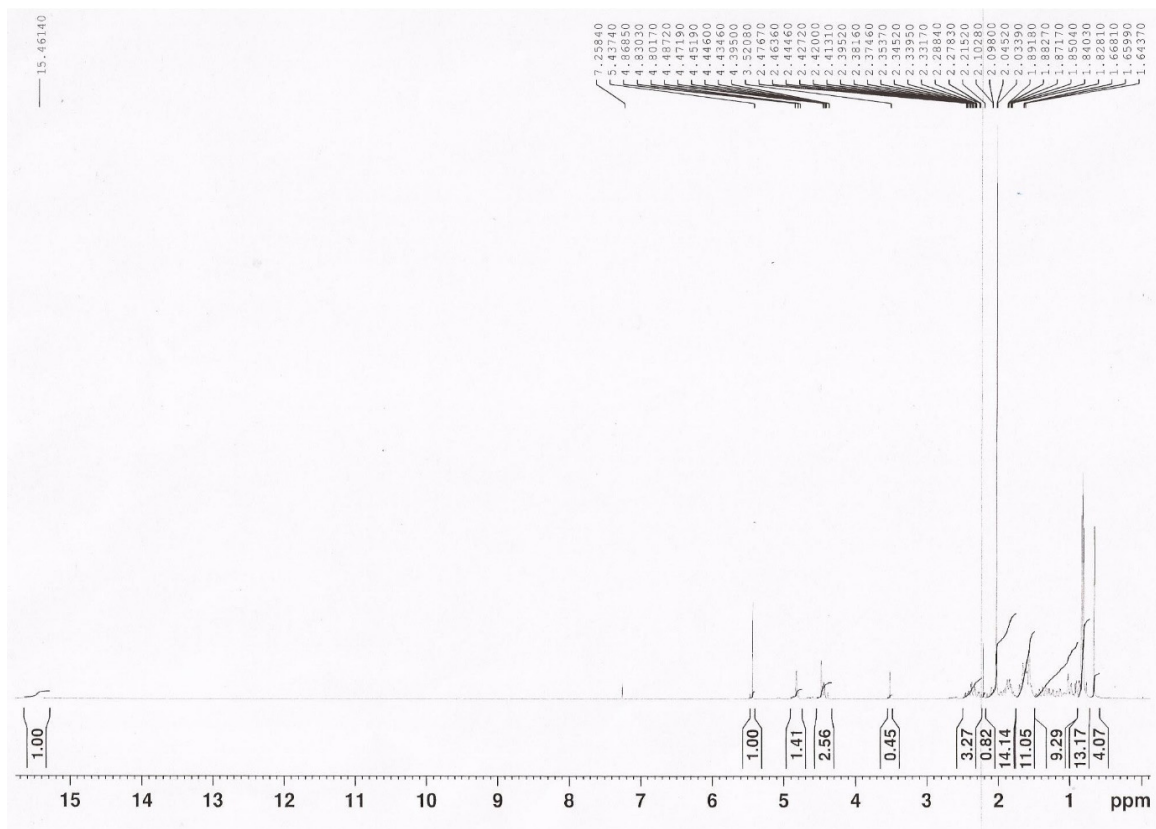

Figure S1.  $^1\text{H}$  NMR spectrum of compound 1 ( $\text{CDCl}_3$ , 300.13 MHz).

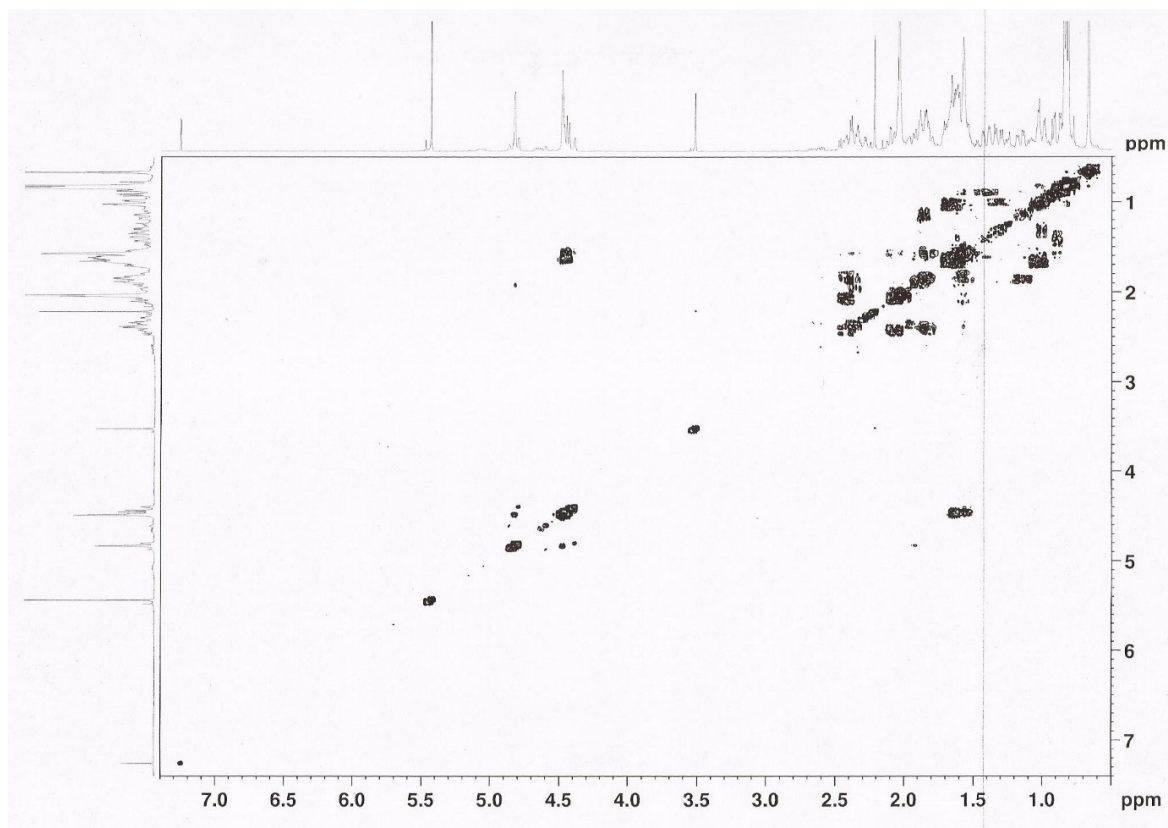

Figure S2. COSY spectrum of compound 1 ( $\text{CDCl}_3$ , 300.13 MHz).

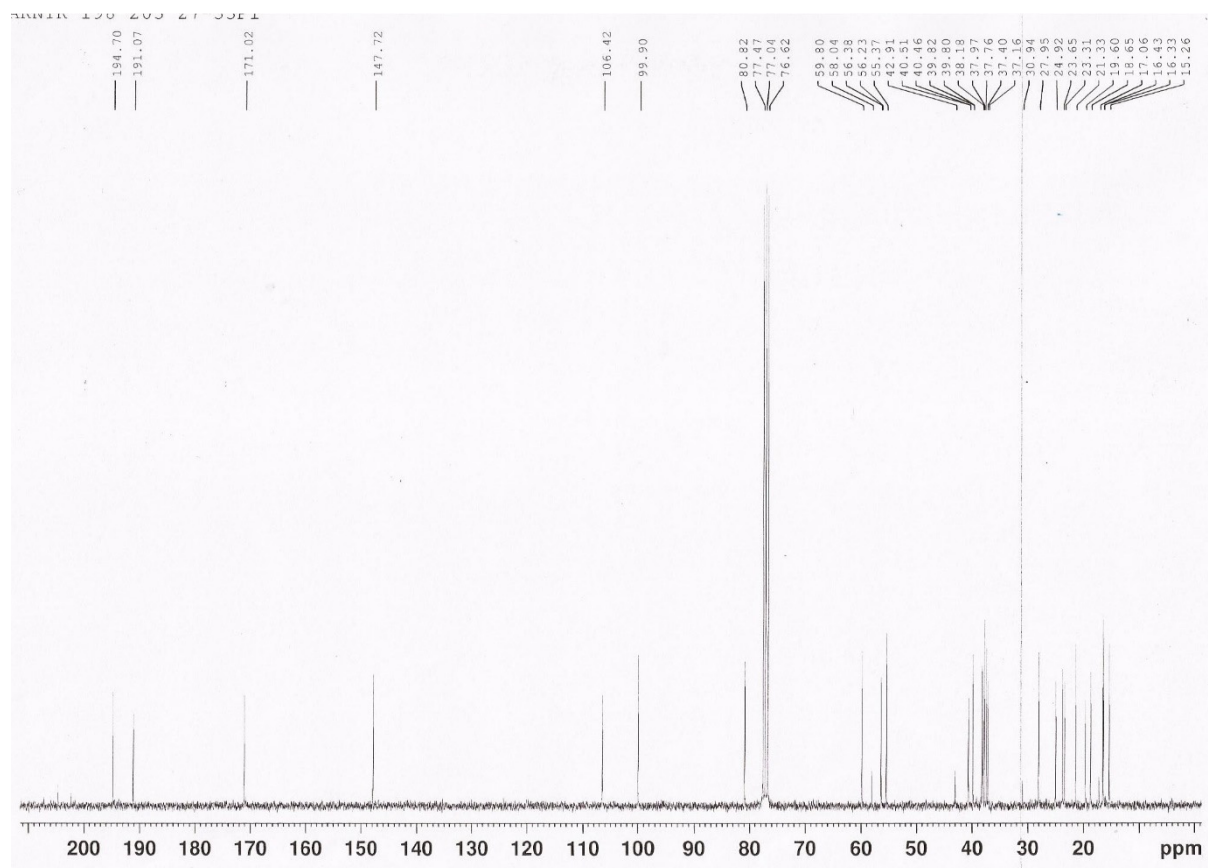

**Figure S3.**  $^{13}\text{C}$  NMR spectrum of compound **1** ( $\text{CDCl}_3$ , 75.4 MHz).

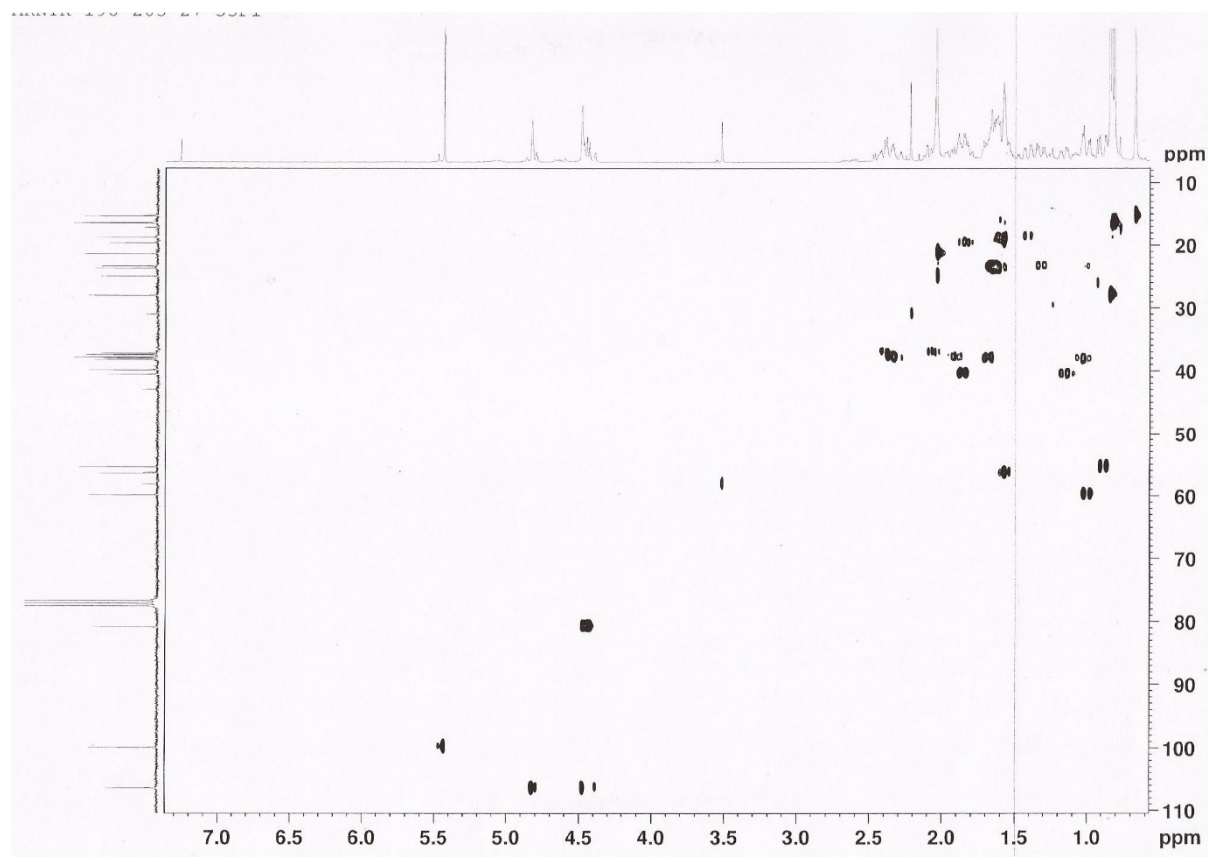

**Figure S4.** HSQC spectrum of compound **1** ( $\text{CDCl}_3$ , 300.13 MHz).

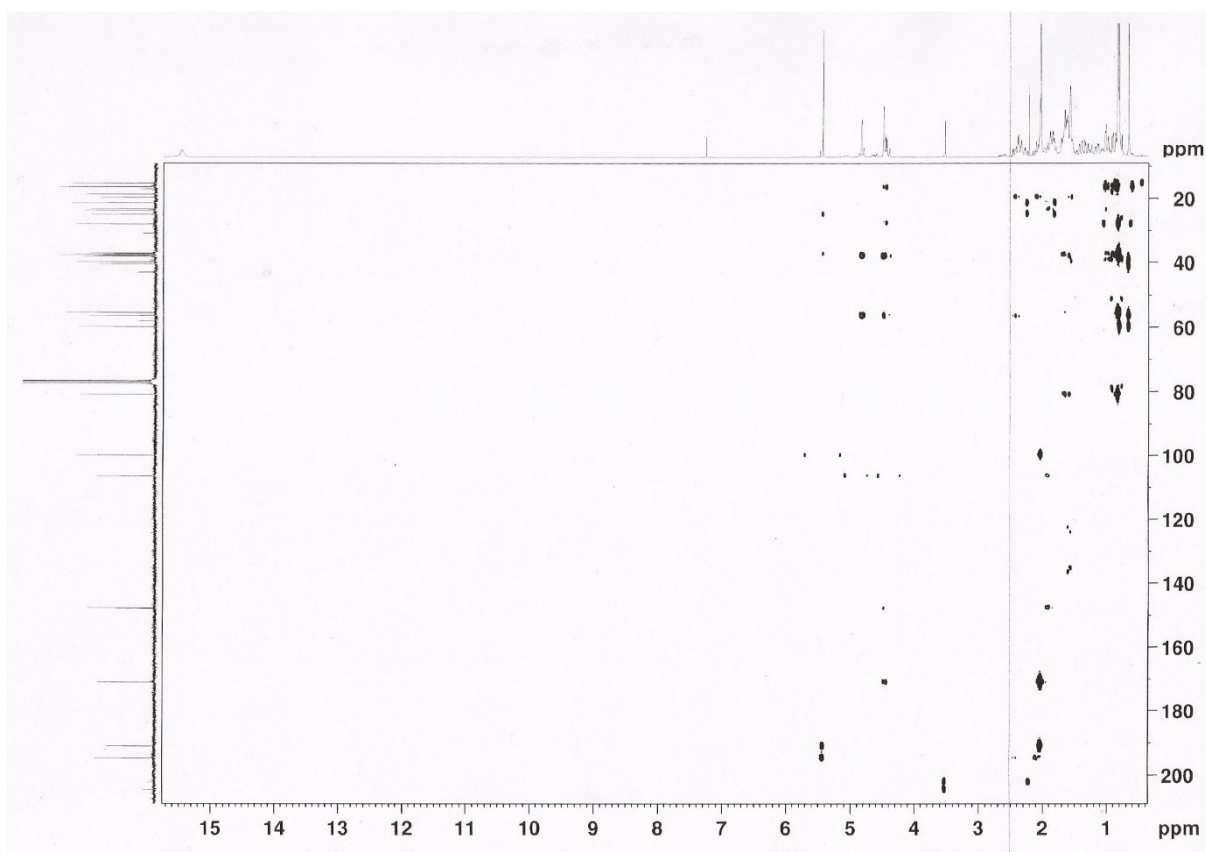

**Figure S5.** HMBC spectrum of compound **1** (CDCl<sub>3</sub>, 300.13 MHz).

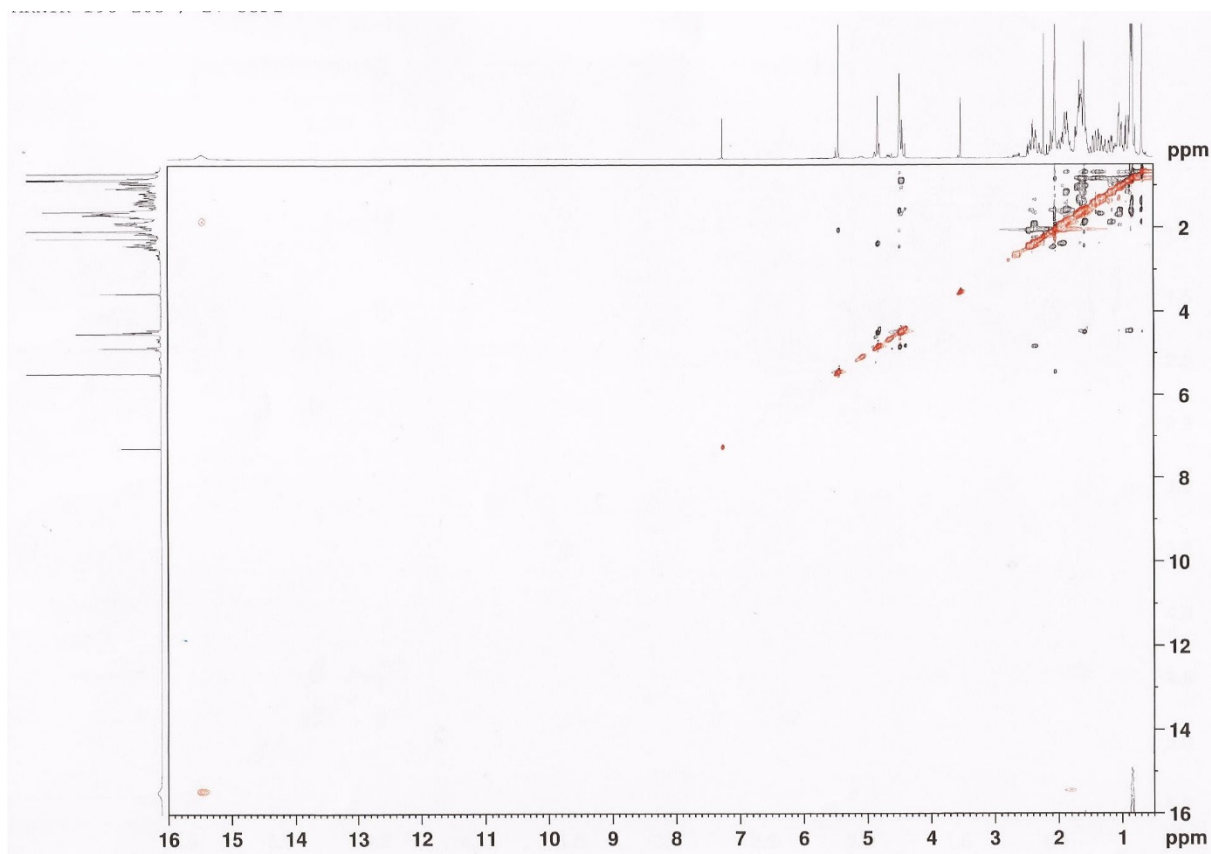

**Figure S6.** NOESY spectrum of compound **1** (CDCl<sub>3</sub>, 300.13 MHz).

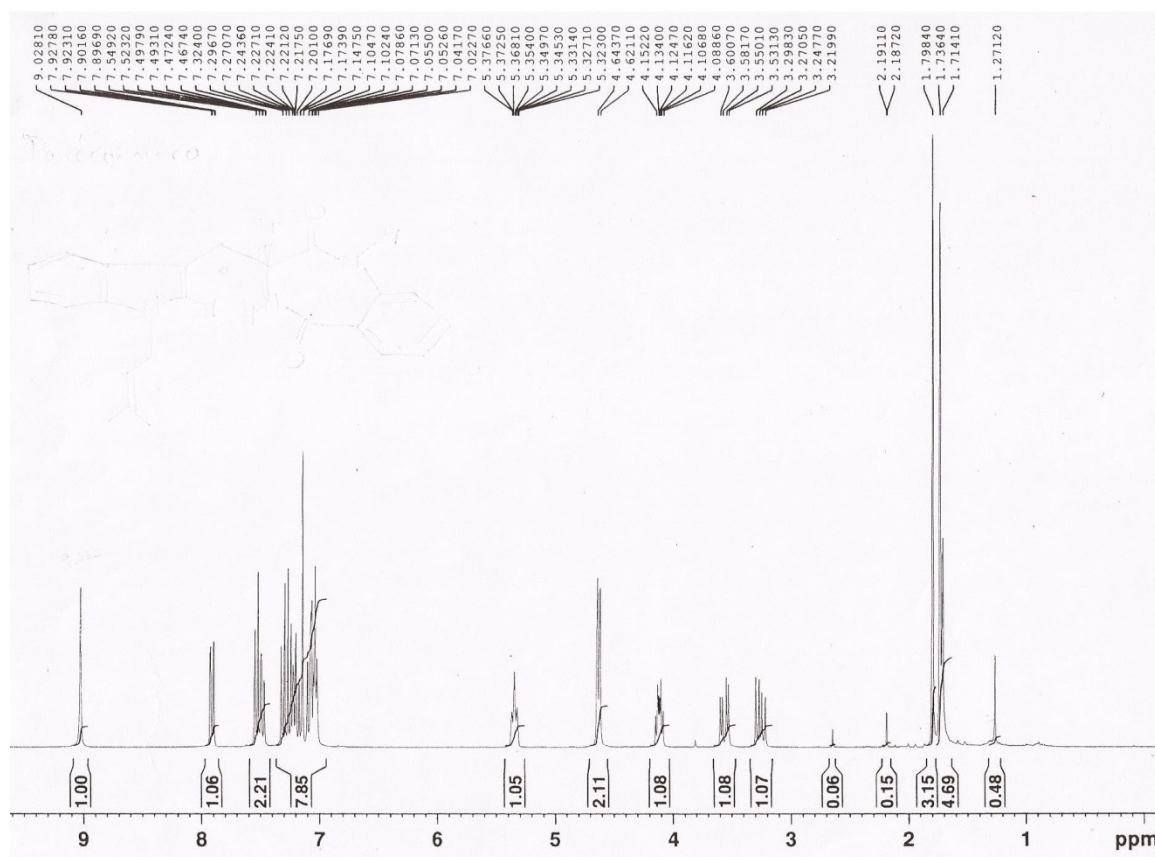

Figure S7. <sup>1</sup>H NMR spectrum of compound 2 (CDCl<sub>3</sub>, 300.13 MHz).

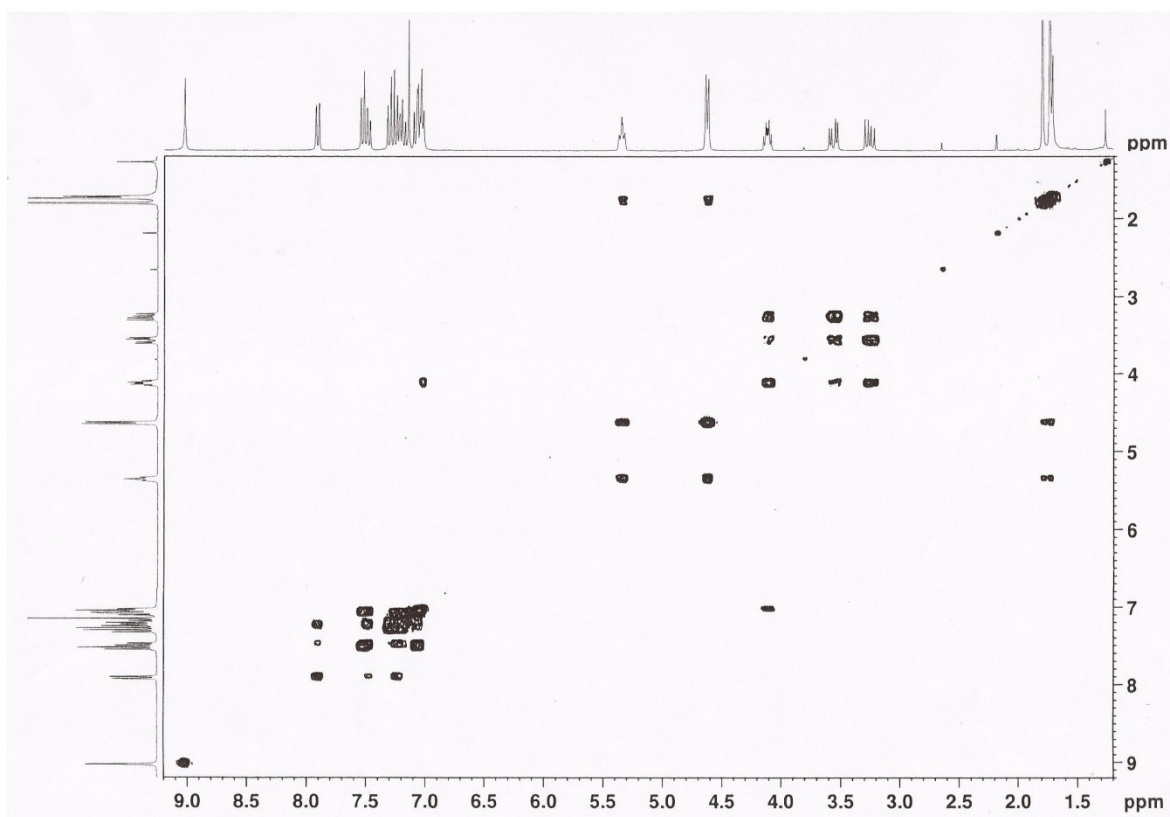

Figure S8. COSY spectrum of compound 2 (CDCl<sub>3</sub>, 300.13 MHz).



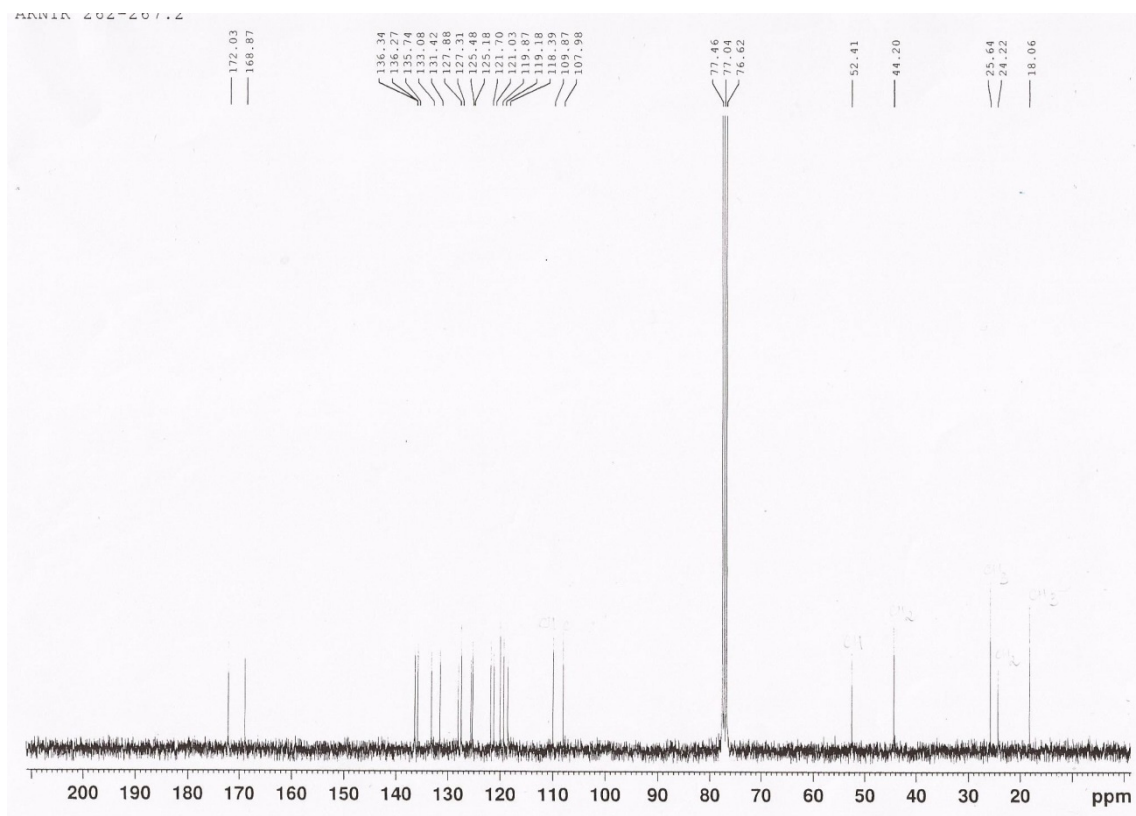

**Figure S9.**  $^{13}\text{C}$  NMR spectrum of compound **2** ( $\text{CDCl}_3$ , 75.4 MHz).

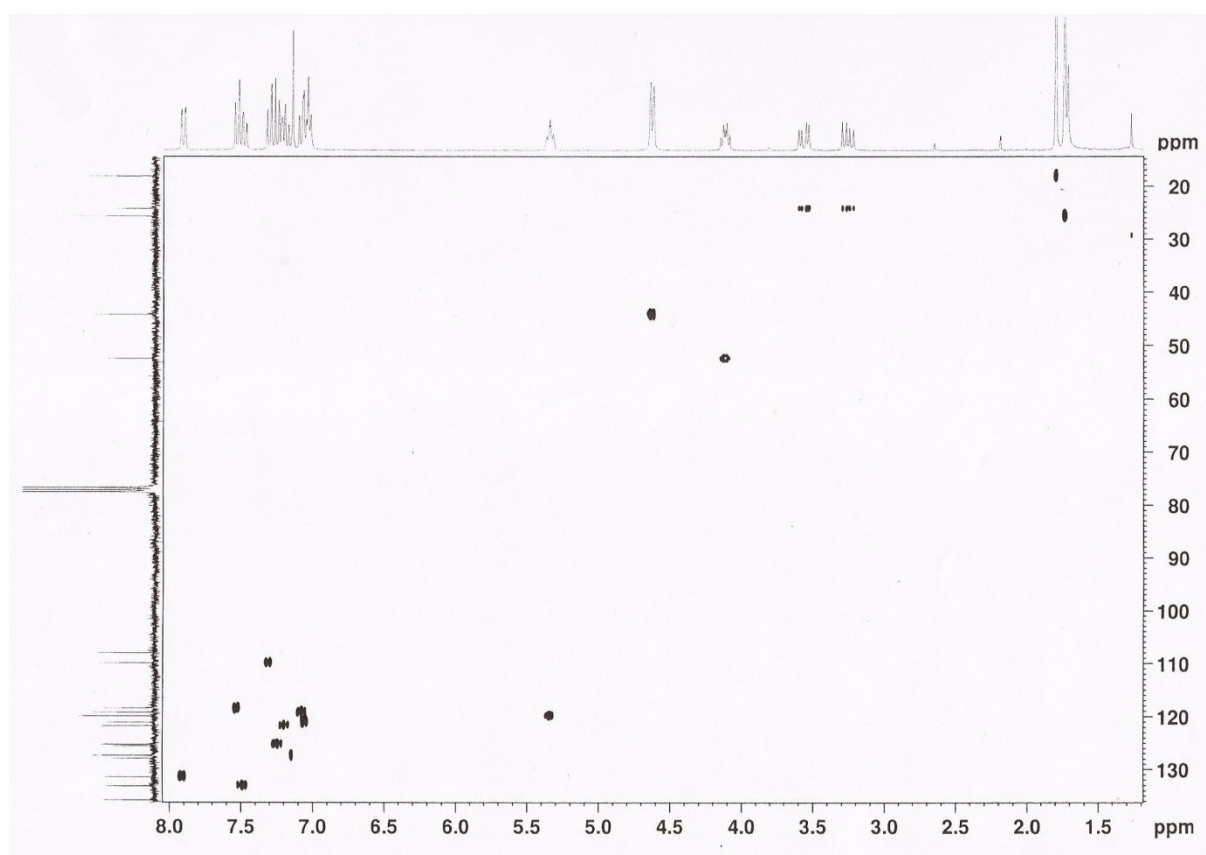

**Figure S10.** HSQC spectrum of compound **2** ( $\text{CDCl}_3$ , 300.13 MHz).

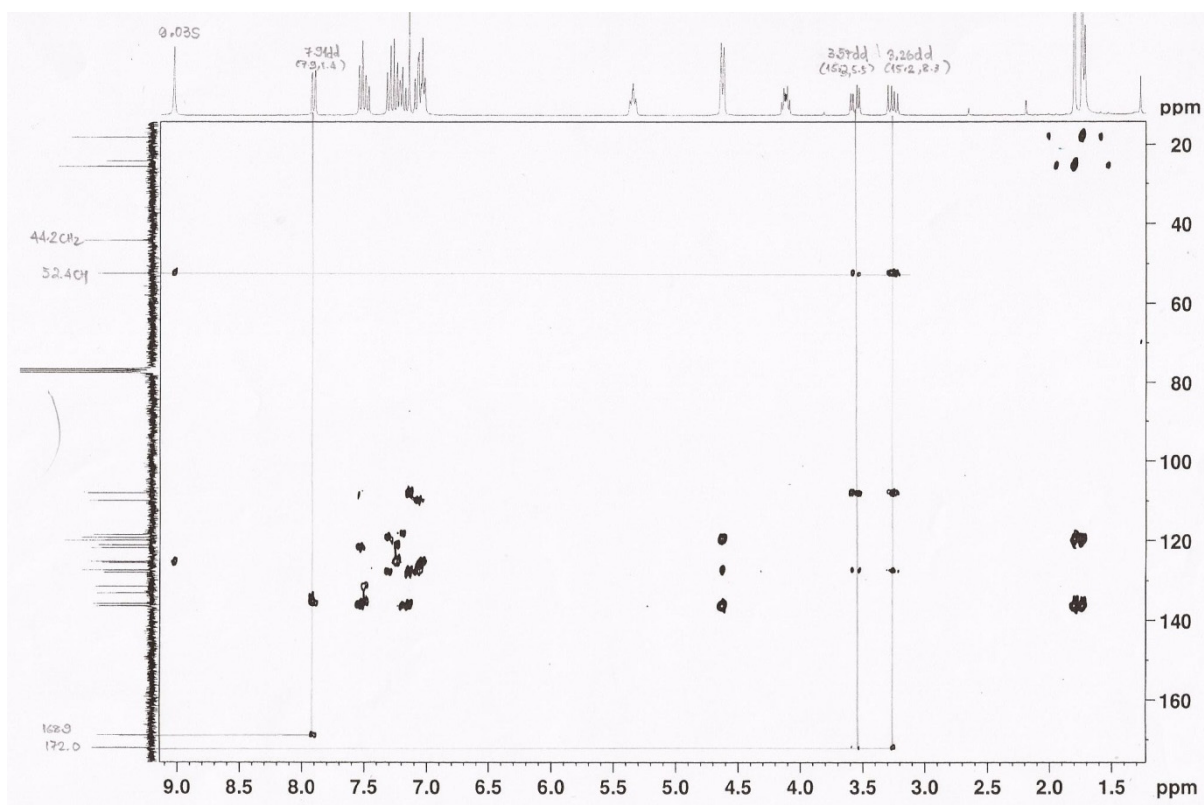

**Figure S11.** HMBC spectrum of compound **2** (CDCl<sub>3</sub>, 300.13 MHz).

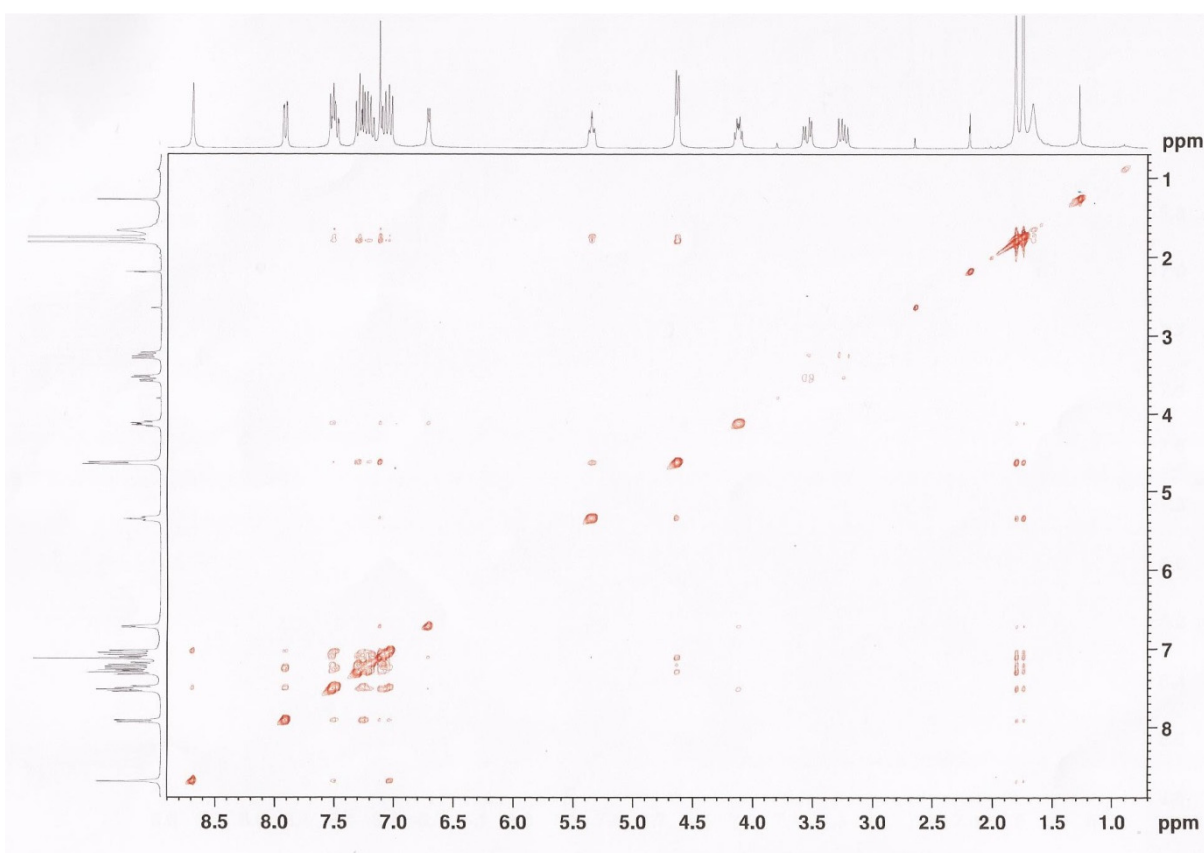

**Figure S12.** NOESY spectrum of compound **2** (CDCl<sub>3</sub>, 300.13 MHz).

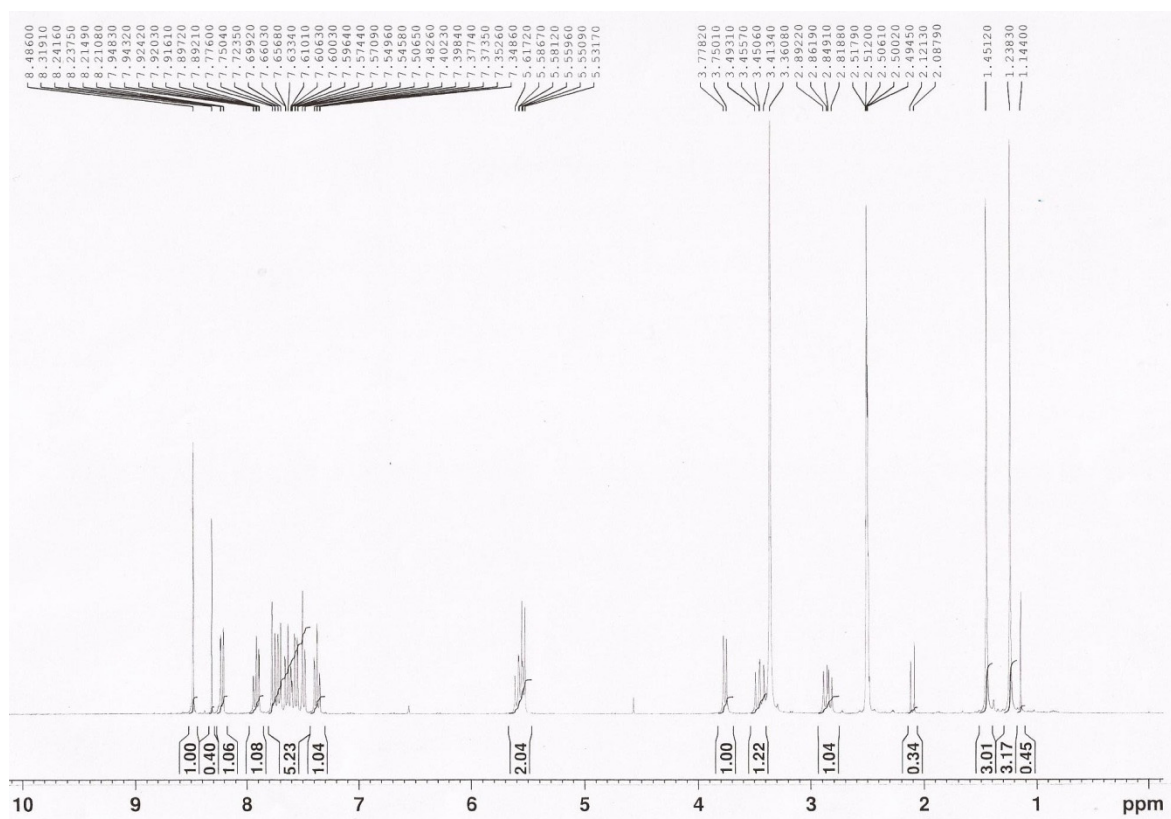

Figure S13.  $^1\text{H}$  NMR spectrum of compound **3** (DMSO, 300.13 MHz).

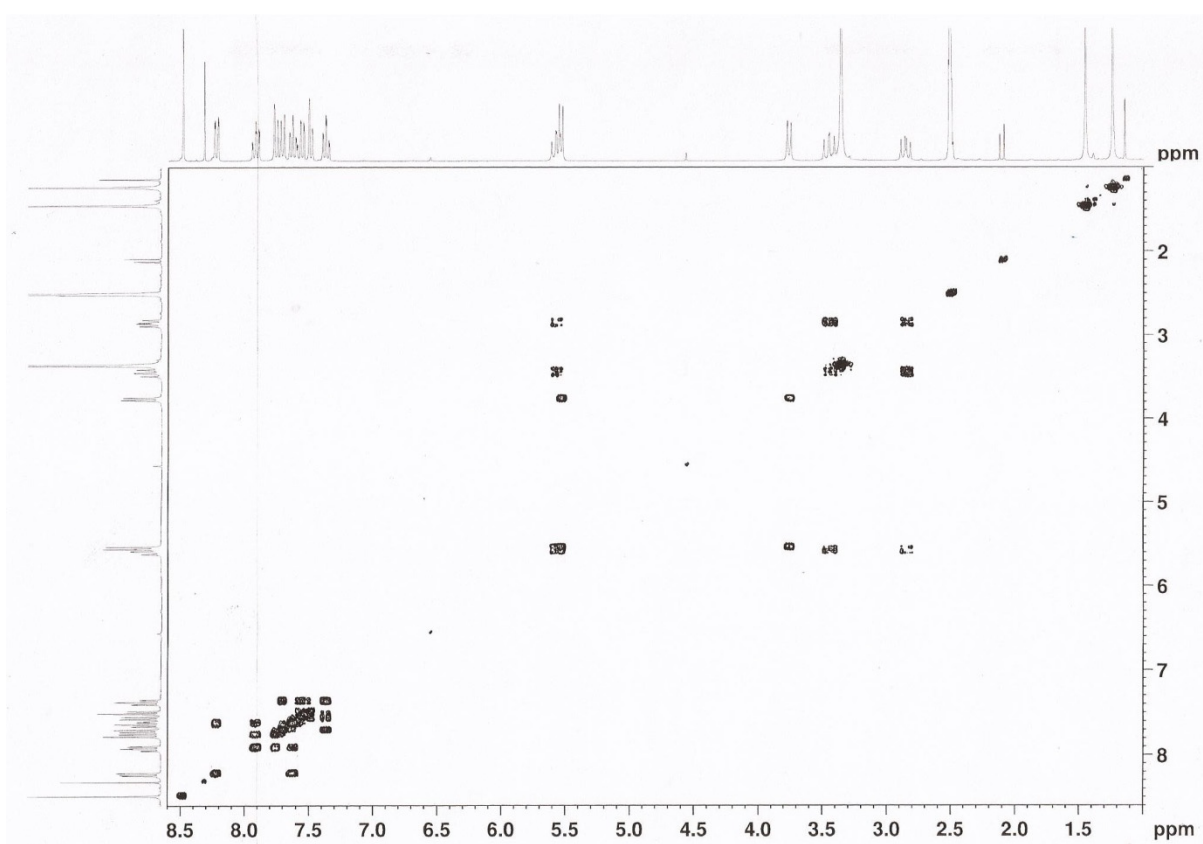

Figure S14. COSY spectrum of compound **3** (DMSO, 300.13 MHz).

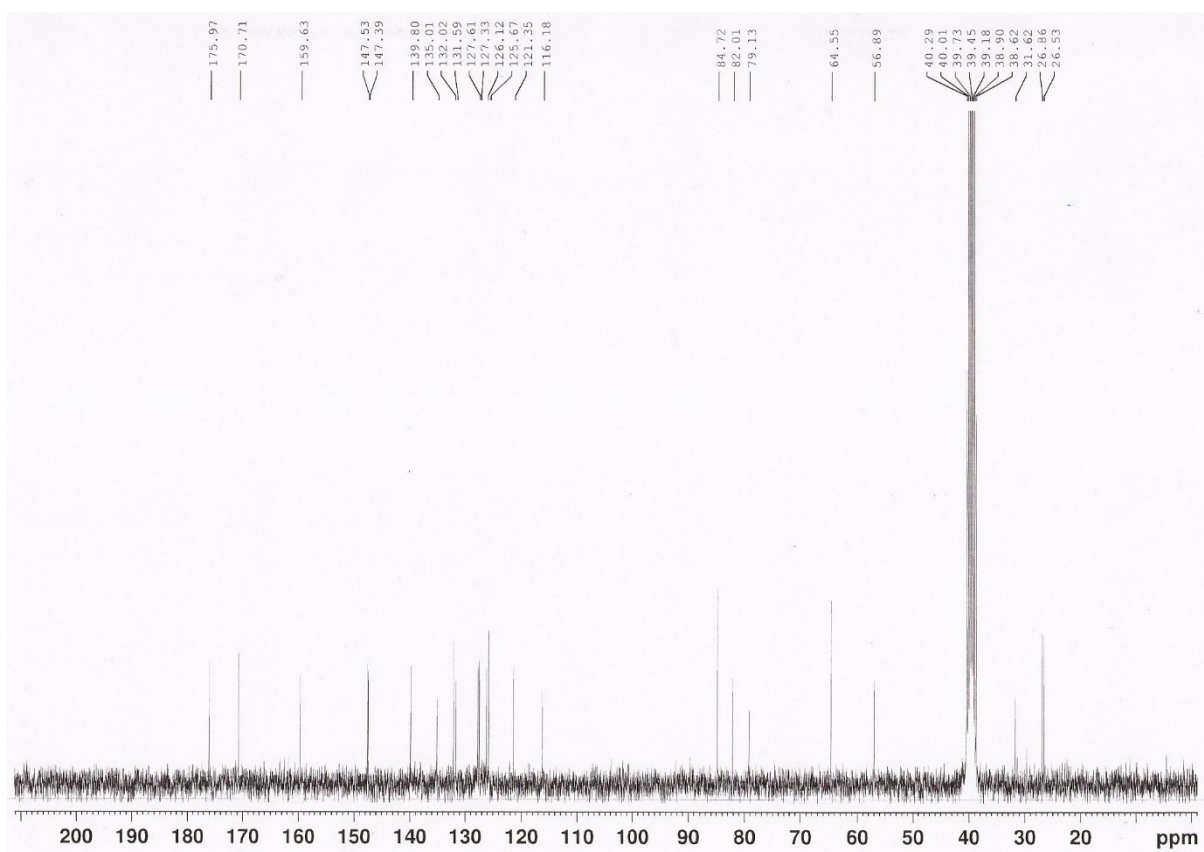

Figure S15.  $^{13}\text{C}$  NMR spectrum of compound **3** (DMSO, 75.4 MHz).

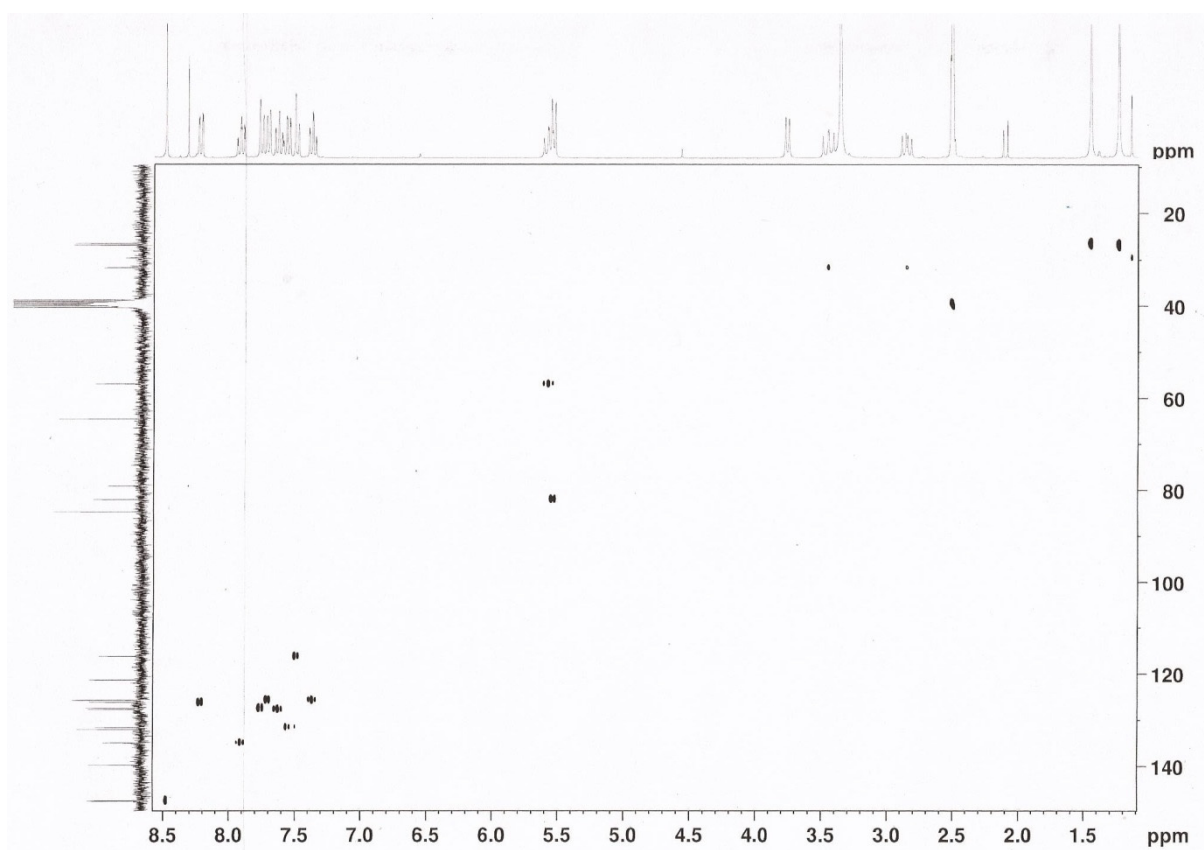

Figure S16. HSQC spectrum of compound **3** (DMSO, 300.13 MHz).



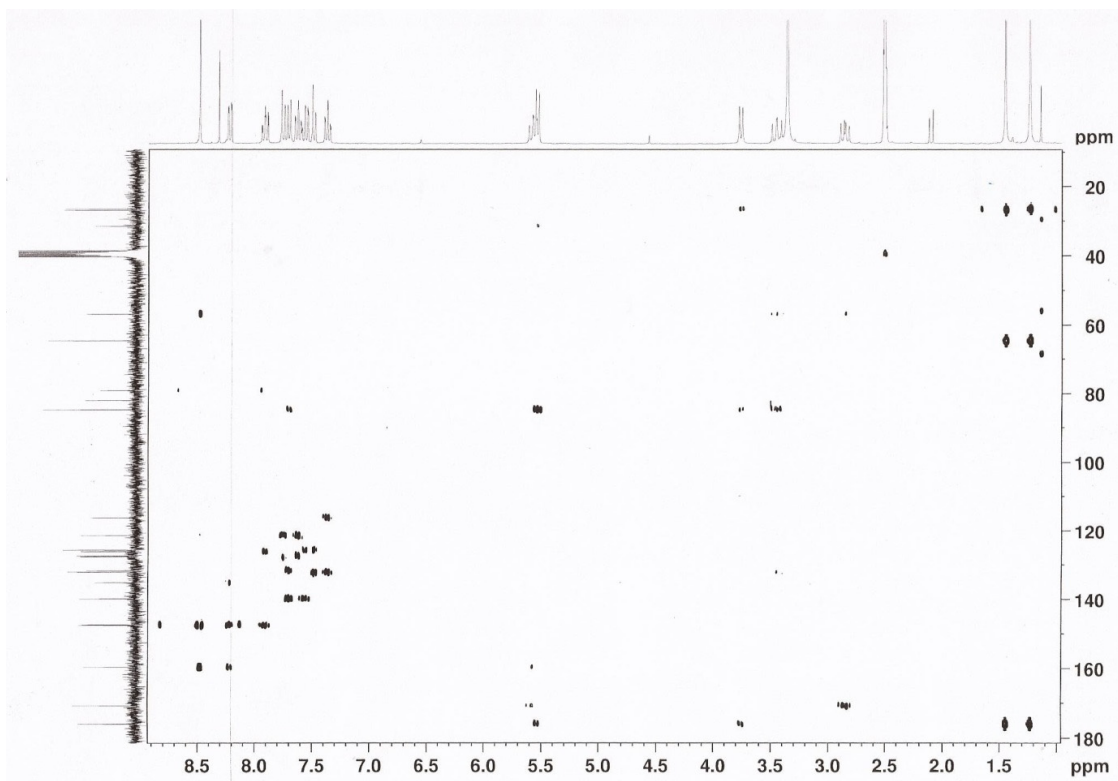

**Figure S17.** HMBC spectrum of compound **3** (DMSO, 300.13 MHz).

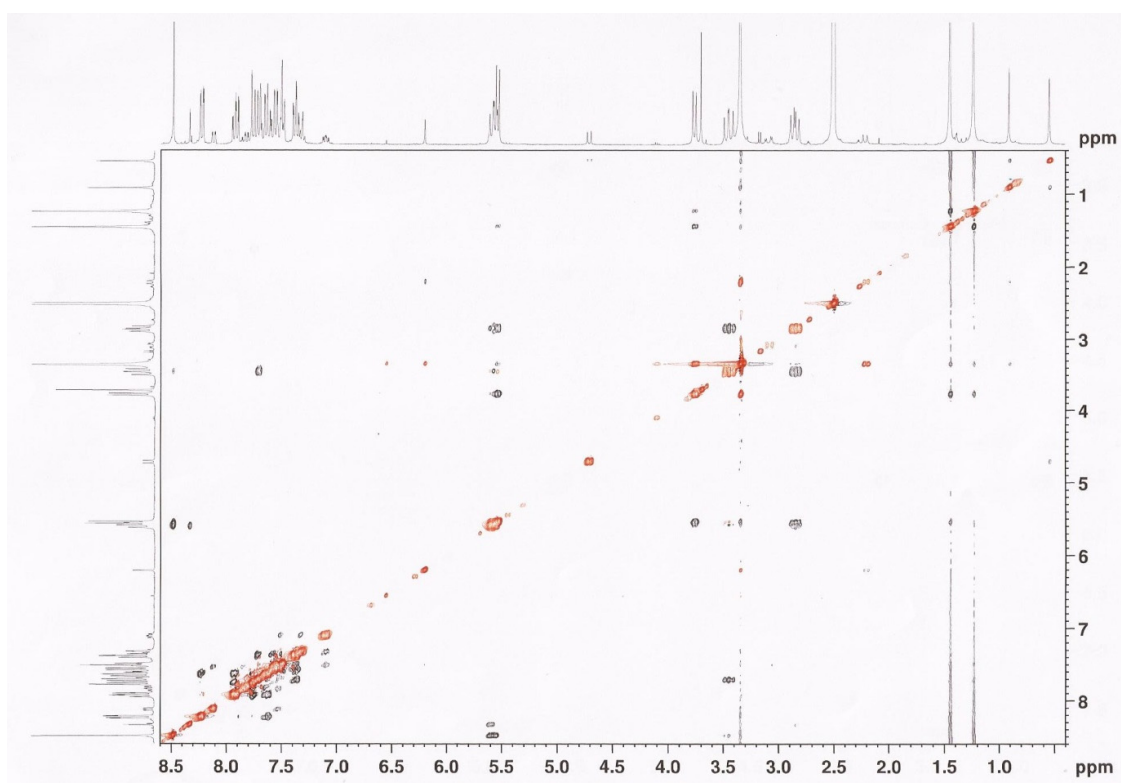

**Figure S18.** NOESY spectrum of compound **3** (DMSO, 300.13 MHz).
